# Supplementary material for: Modulation of the binding sites for an adaptable DNA interactive probe: efficient chromo-fluorogenic recognition of Al3+ and live cell bioimaging
Source: Royal Society of Chemistry journal article supplement (doi:10.1039/d4sd00242c), 2024-01-01
Supplement: d4sd00242c1.pdf [file d4sd00242c1.pdf]

## Supporting Information

### **Modulation of the binding sites for an adaptable DNA interactive probe: efficient chromofluorogenic recognition of Al<sup>3+</sup> and live cell bioimaging**

Atanu Maji, Debarpan Mitra, Amitav Biswas, Moumita Ghosh, Rahul Naskar, Saswati Gharami, Nabendu Murmu and Tapan K. Mondal\*

<sup>†</sup>*Department of Chemistry, Jadavpur University, Kolkata- 700032, India. E-mail: [tapank.mondal@jadavpuruniversity.in](mailto:tapank.mondal@jadavpuruniversity.in)*

<sup>‡</sup>*Department of Signal Transduction and Biogenesis Amines (STBA), Chittaranjan National Cancer Institute, Kolkata- 700026, India. E-mail: [nabendu.murmu@cnci.org.in](mailto:nabendu.murmu@cnci.org.in)*

## CONTENTS

**Fig. S1:** <sup>1</sup>H-NMR spectrum of HMCP

**Fig. S2:** <sup>13</sup>C-NMR spectra of HMCP

**Fig. S3:** ESI mass spectra of HMCP

**Fig.S4:** <sup>1</sup>H-NMR spectrum of MCMP

**Fig. S5:** <sup>13</sup>C-NMR spectra of MCMP

**Fig. S6:** ESI mass spectra of MCMP

**Fig.S7:** <sup>1</sup>H-NMR spectrum of MCMB

**Fig. S8:** <sup>13</sup>C-NMR spectra of MCMB

**Fig. S9:** ESI mass spectra of MCMB

**Fig. S10:** Change in UV-Vis spectra of the MCMP (10 μM) and MCMB upon gradual addition of 2 equivalent of Al<sup>3+</sup> (10 μM)

**Fig. S11:** Change in emission spectra of the the MCMP (10 μM) and MCMB upon gradual addition of 2 equivalent of Al<sup>3+</sup> (10 μM)

**Figure S12:** Change in emission intensity of HMCP (10 μM) upon addition of different metal ions (40 μM) in MeOH at pH=7.2

**Table. S1:** Comparison of fluorescence intensity enhancement of HMCP and its analogues (10 μM) upon addition of Al<sup>3+</sup> (20 μM).

**Fig. S13:** Linear response curve of HMCP depending on Al<sup>3+</sup> concentration

**Fig. S14:** Binding constant curve of HMCP depending on Al<sup>3+</sup> concentration from fluorescence titration data

**Fig. S15:** Lifetime decay profile of HMCP and HMCP-Al<sup>3+</sup>

**Fig. S16:** Bar diagram illustration of the relative emission intensity of HMCP upon addition of various metals (10 μM) in MeOH and Al<sup>3+</sup> (20 μM) in presence of other metal ions.

**Fig. S17:** Fluorescence ‘OFF-ON-OFF’ repetitive cycle upon each sequential addition of Al<sup>3+</sup> and EDTA

**Fig. S18:** Job’s plot of HMCP for Al<sup>3+</sup>

**Table S2:** Comparison of emission intensity enhancement of HMCP and its analogues upon addition of ct-DNA

**Table S3:** Recovery experiment for various natural water samples using the proposed methods

**Fig. S19:** IC<sub>50</sub> dose of the probe (HMCP) in human breast cancer cells

**Table S4:** Determination of emission quantum yield (Φ) of HMCP and its complex with Al<sup>3+</sup>

**Fig. S20:** pH study of HMCP for Al<sup>3+</sup>

**Fig. S21:** HRMS of HMCP-Al<sup>3+</sup> complex

**Fig. S22:** Photosensitivity study of HMCP and its complex

**Fig. S23:** Determination of binding constant of HMCP depending on ct-DNA concentration using Benesi-Hildebrand equation

**Fig. S24:** Optimized structure of HMCP calculated by DFT/B3LYP/6-31+G(d) method

**Fig. S25:** Optimized structure of HMCP-Al<sup>3+</sup> calculated by DFT/B3LYP/6-31+G(d) method

**Fig. S26:** Contour plots of some selected molecular orbitals of HMCP

**Fig. S27:** Contour plots of some selected molecular orbitals of HMCP-Al<sup>3+</sup>

**Table S5.** Energy and compositions of some selected molecular orbitals of HMCP - Al<sup>3+</sup>

**Table S6.** Vertical electronic transitions calculated by TDDFT/B3LYP/CPCM method for HMCP and HMCP-Al<sup>3+</sup> in methanol

**Fig. S28:** Solvent optimization: Emission intensity change and fluorescence image of HMCP in different solvents in presence of Al<sup>3+</sup>

**Table S7:** Comparison of sensor HMCP with other previously reported probes with respect to testing condition LOD value and test strips experiment.

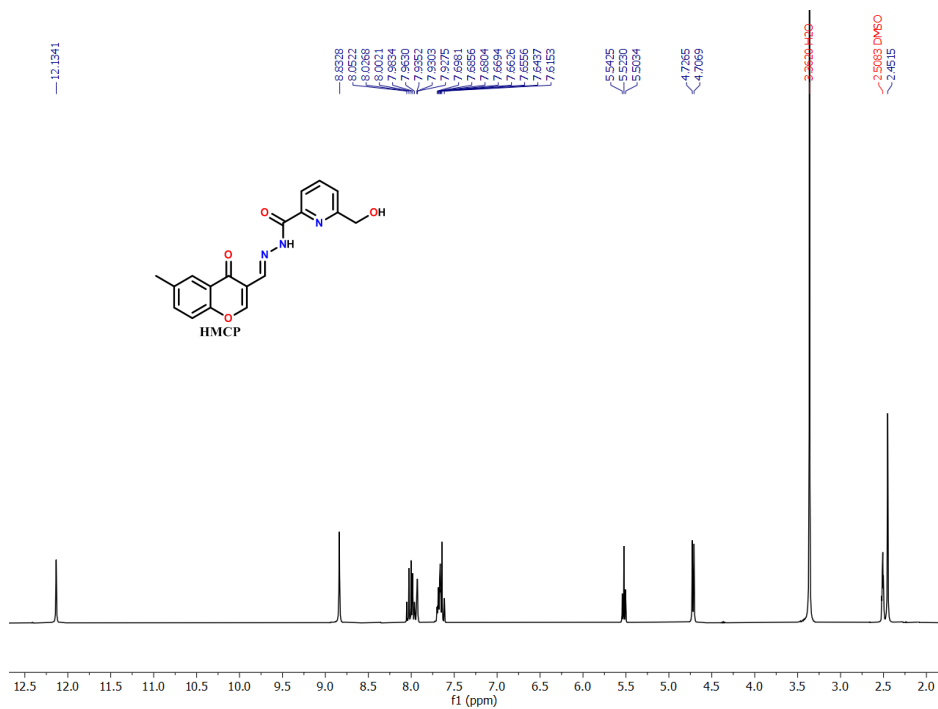

**Figure S1:**  $^1\text{H NMR}$  (300 MHz) spectra of the probe (HMCP) in  $\text{DMSO-d}_6$

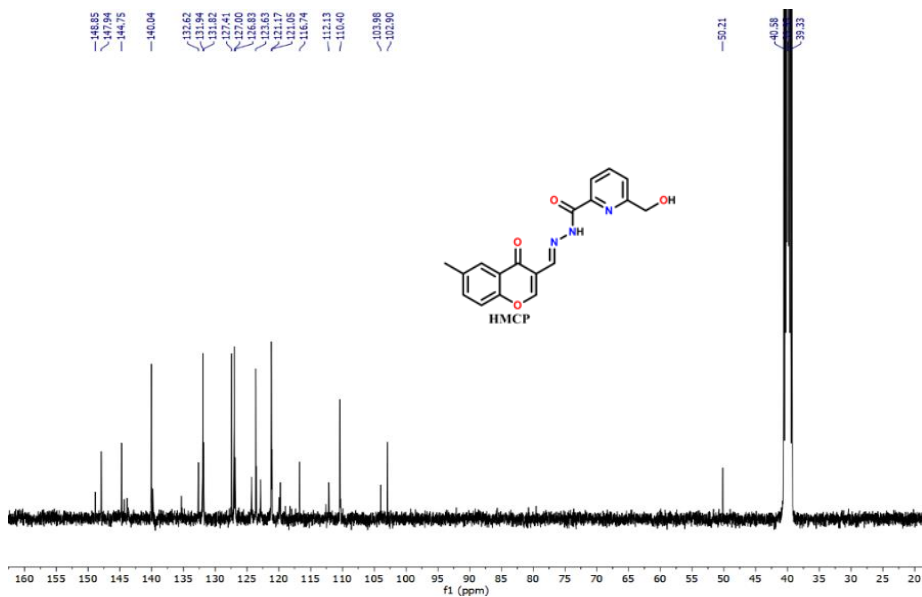

**Figure S2:**  $^{13}\text{C NMR}$  (75 MHz) spectra of the probe (HMCP) in  $\text{DMSO-d}_6$

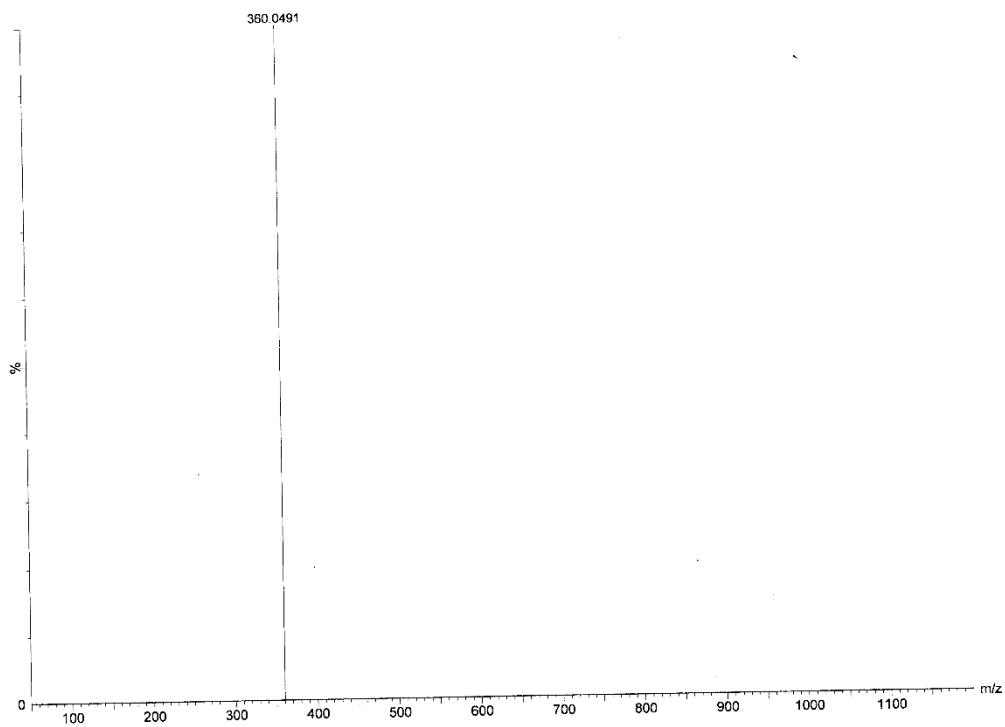

**Figure S3:** HRMS of the probe (HMCP)

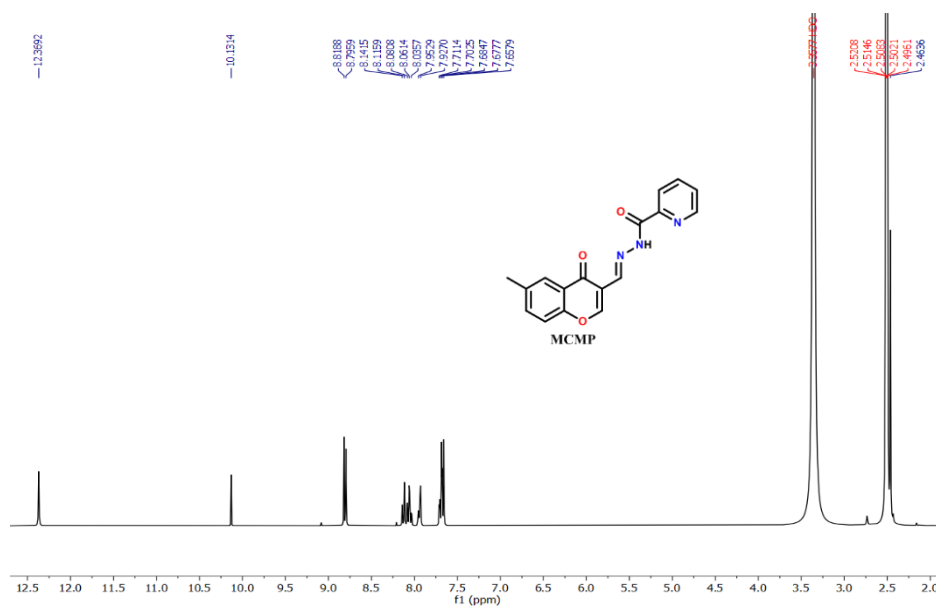

**Figure S4:** <sup>1</sup>H NMR (300 MHz) spectra of the probe (MCMP) in DMSO-d<sub>6</sub>

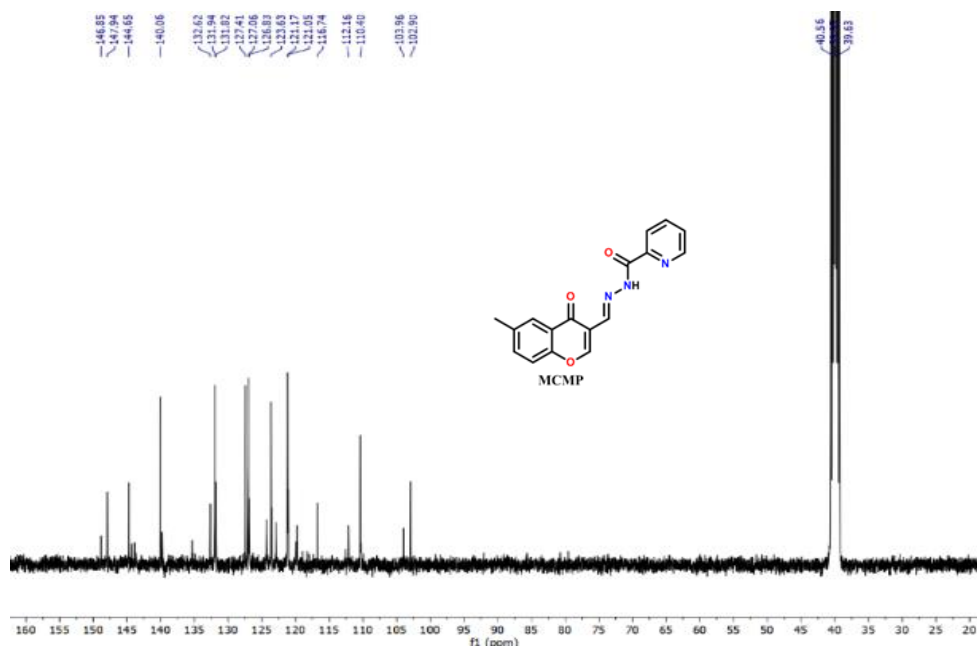

Figure S5: <sup>13</sup>C NMR (75 MHz) spectra of the probe (MCMP) in DMSO-d<sub>6</sub>

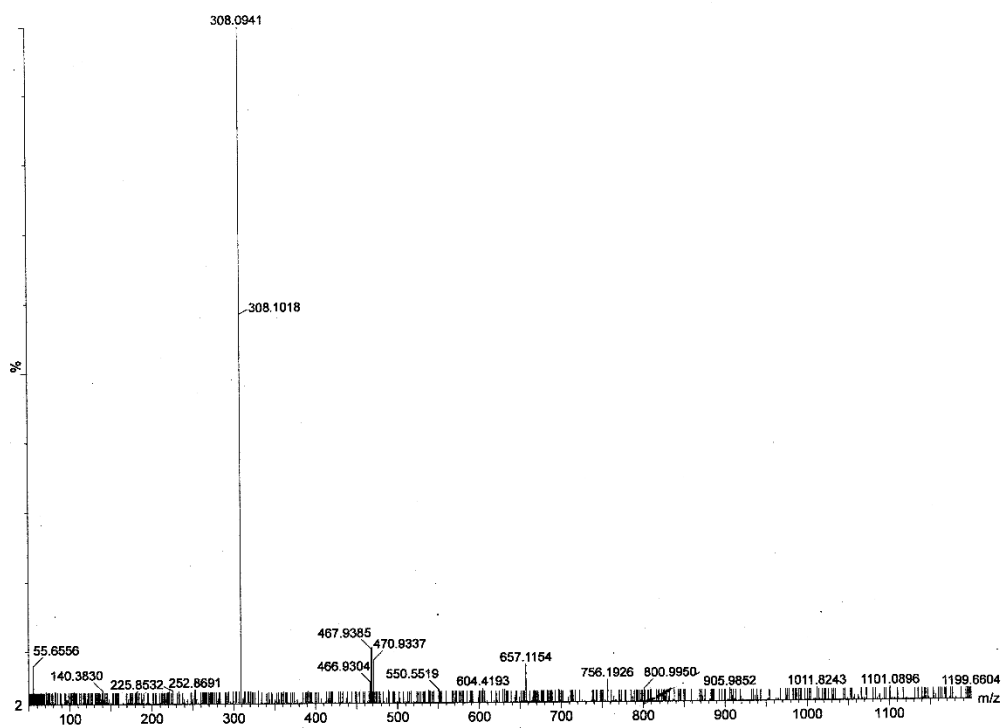

Figure S6: HRMS of the probe (MCMP)

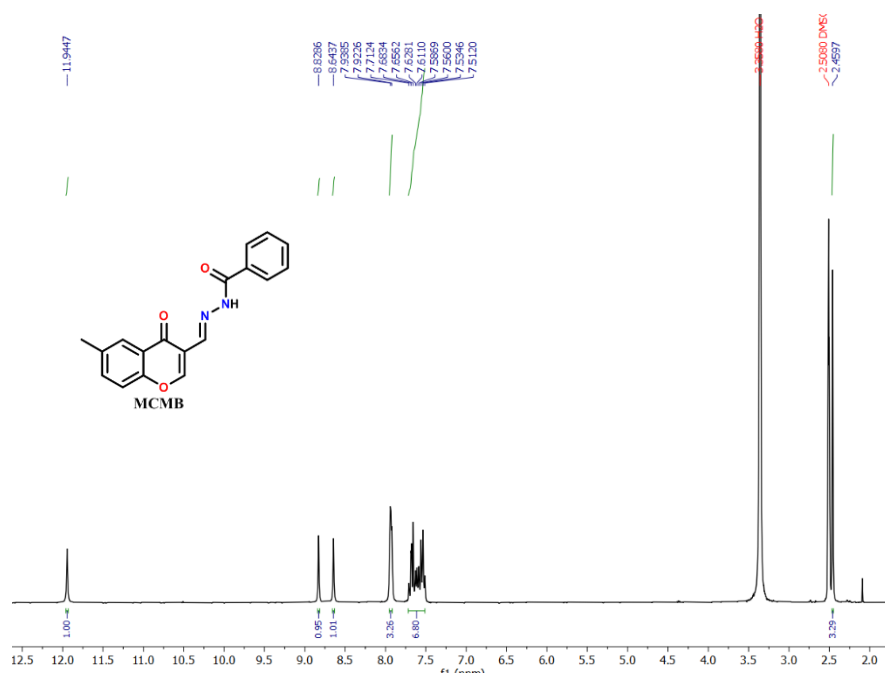

**Figure S7:** <sup>1</sup>H NMR (300 MHz) spectra of the probe (MCMB) in DMSO-d<sub>6</sub>

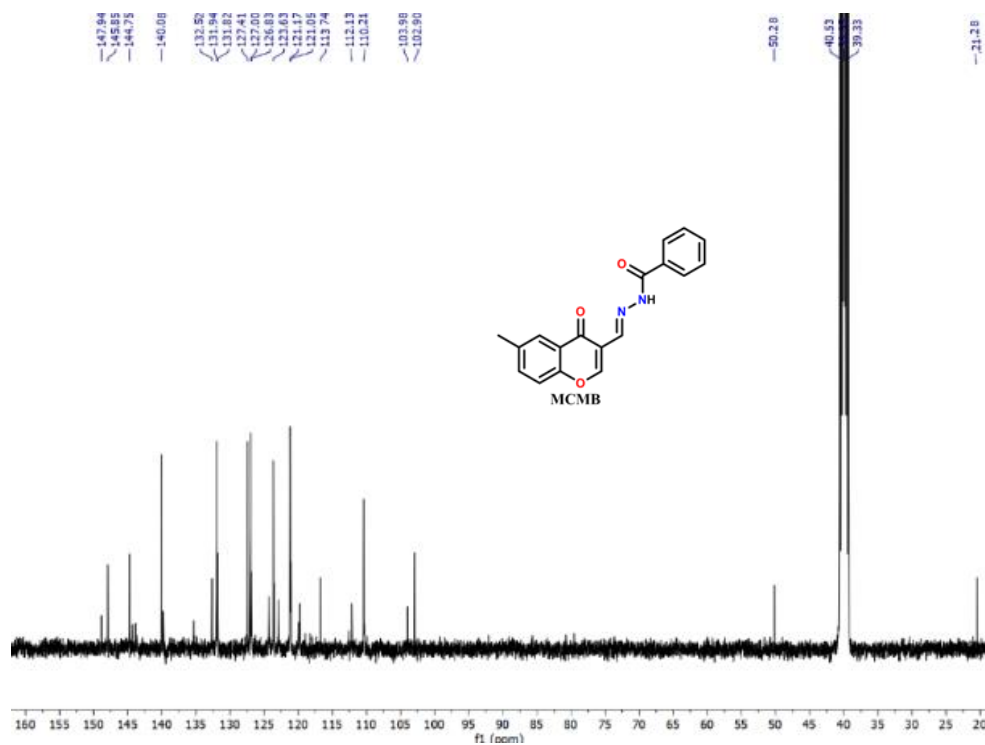

**Figure S8:** <sup>13</sup>C NMR (75 MHz) spectra of the probe (MCMB) in DMSO-d<sub>6</sub>

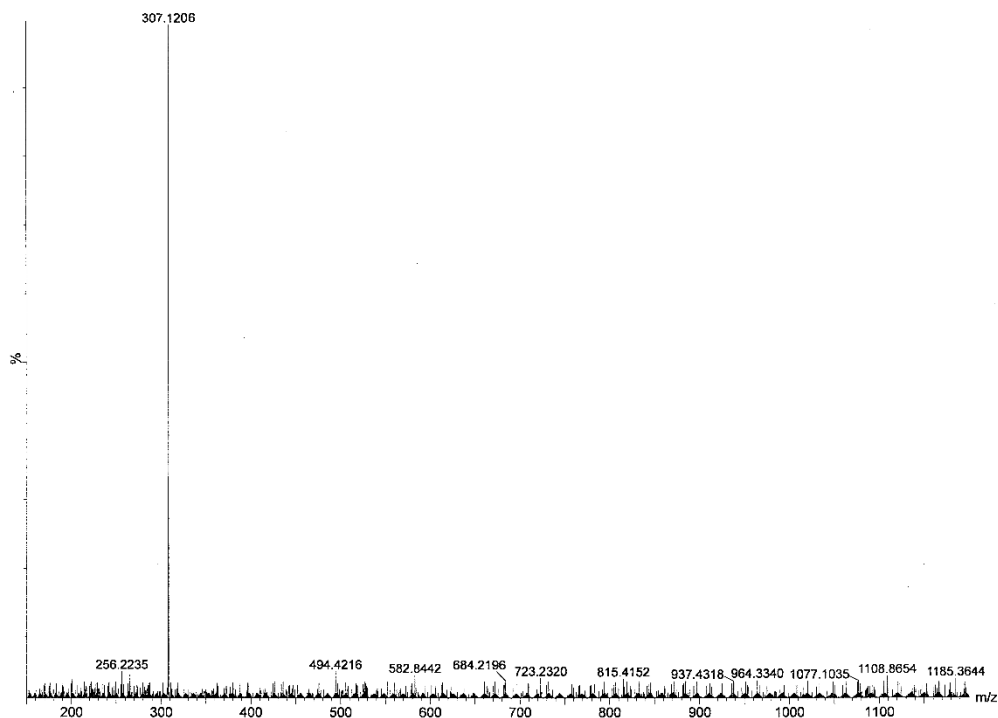

**Figure S9:** HRMS of the probe (MCMB)

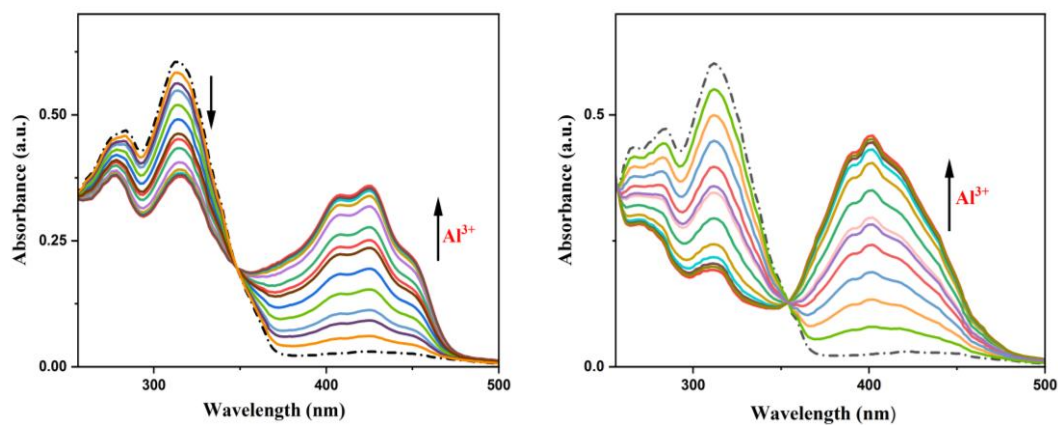

**Figure S10:** Change in UV-Vis spectrum of MCMP (10  $\mu\text{M}$ ) (Left side) and MCMB (10  $\mu\text{M}$ ) (Right side) upon incremental addition of  $\text{Al}^{3+}$  (0-20  $\mu\text{M}$ ) in MeOH /  $\text{H}_2\text{O}$  (9:1, v/v) (HEPES Buffer, pH =7.2) (left side) and change in UV-Vis spectrum of MCMB (10  $\mu\text{M}$ ) upon gradual addition of  $\text{Al}^{3+}$  (0-20  $\mu\text{M}$ ) in MeOH/ $\text{H}_2\text{O}$  (9:1, v/v) (HEPES Buffer, pH =7.2) (right side).

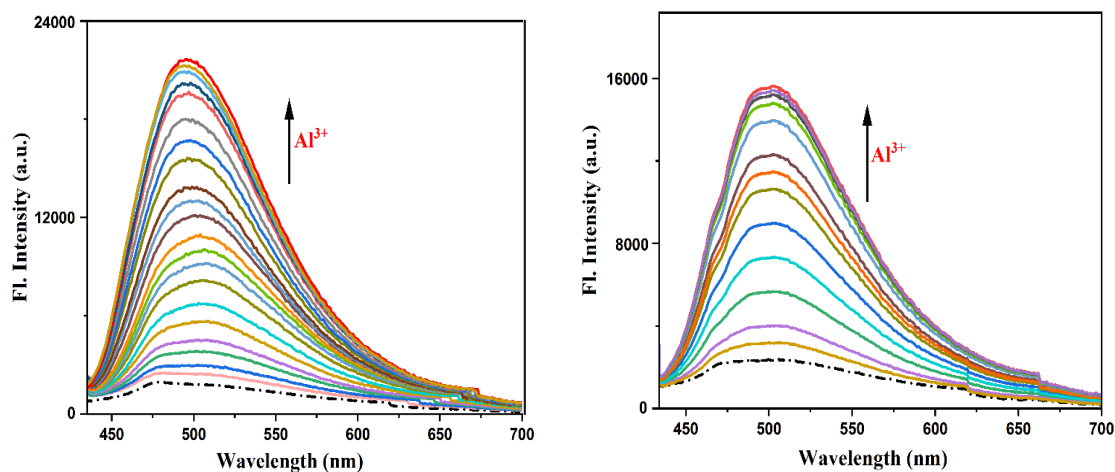

**Figure S11:** Change in emission intensity of MCMP (10  $\mu\text{M}$ ) (Left side) and MCMB (10  $\mu\text{M}$ ) (Right side) upon incremental addition of  $\text{Al}^{3+}$  ion (0-20  $\mu\text{M}$ ) in MeOH/ $\text{H}_2\text{O}$  (9:1, v/v) (HEPES Buffer, pH =7.2).

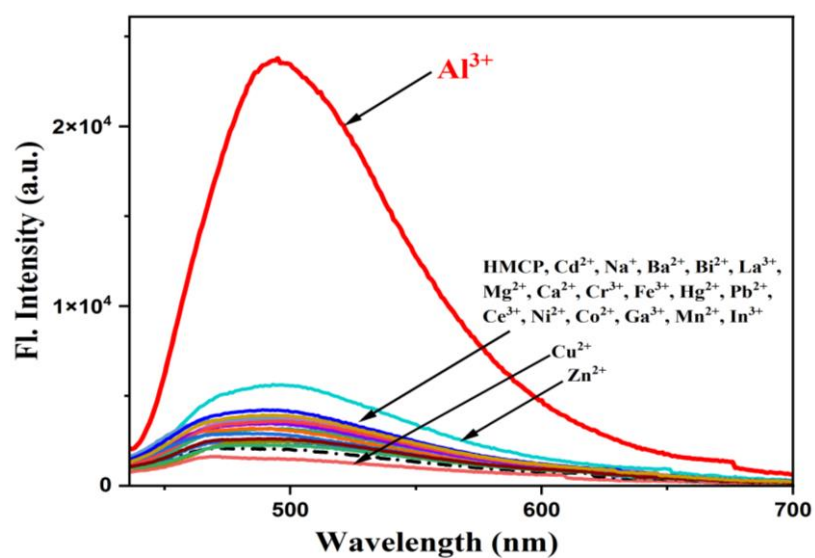

**Figure S12:** Change in emission intensity of HMCP (10  $\mu\text{M}$ ) upon addition of different metal ions (40  $\mu\text{M}$ ) in MeOH/ $\text{H}_2\text{O}$  (9:1, v/v) (HEPES Buffer, pH =7.2).



**Table S1:** Fluorescence intensity enhancement of HMCP and its analogues (10  $\mu\text{M}$ ) upon addition of  $\text{Al}^{3+}$  (20  $\mu\text{M}$ ).

| Compound | Emission intensity enhanced in presence of $\text{Al}^{3+}$ | Excitation at respective isosbestic point |
|----------|-------------------------------------------------------------|-------------------------------------------|
| HMCP     | $\sim 14$ fold                                              | 351 nm                                    |
| MCMP     | $\sim 12$ fold                                              | 347 nm                                    |
| MCMB     | $\sim 9$ fold                                               | 354 nm                                    |

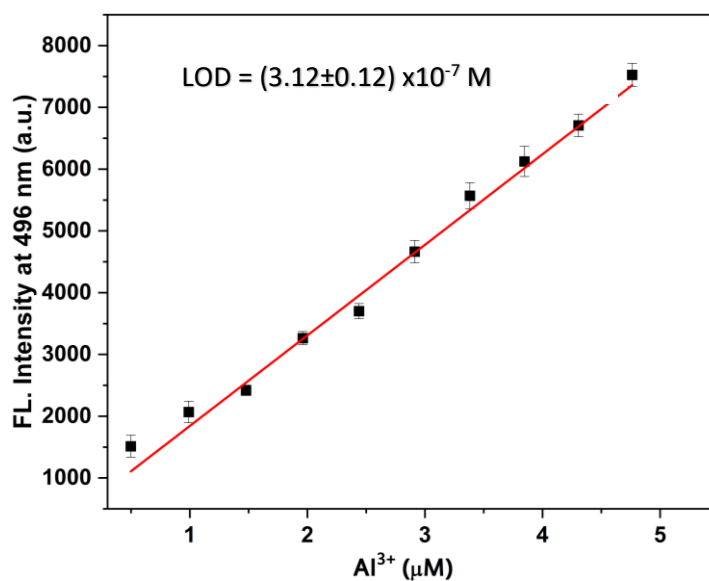

**Figure S13:** Linear response curve of HMCP at 496 nm depending on the  $\text{Al}^{3+}$  concentration

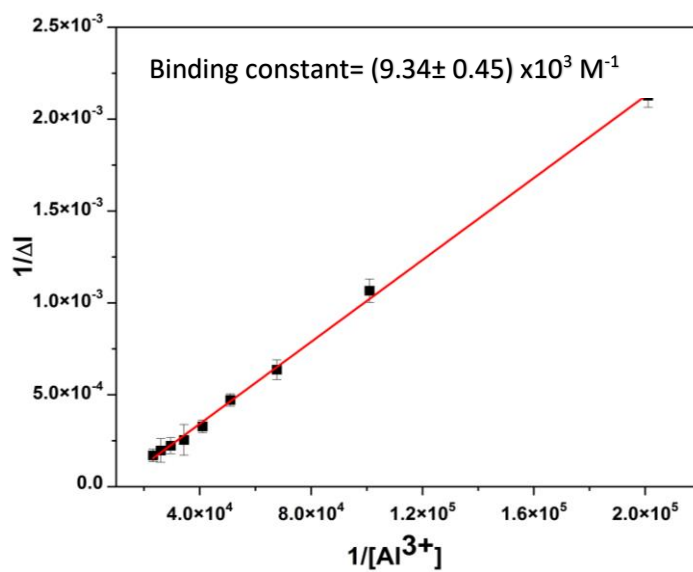

**Figure S14:** Determination of association constant of HMCP at 496 nm depending on the  $\text{Al}^{3+}$  concentration using Benesi-Hildebrand equation

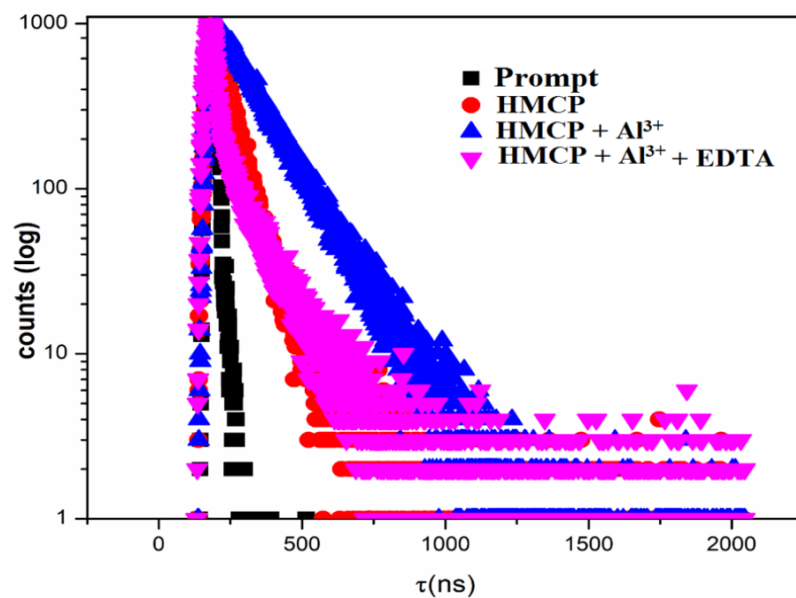

**Figure S15:** Lifetime decay profile of HMCP and HMCP-Al<sup>3+</sup>

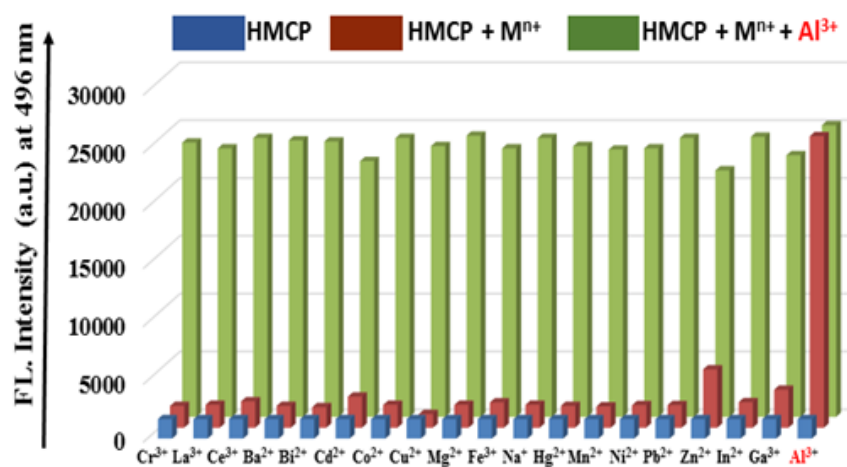

**Figure S16:** Bar diagram illustration of the relative emission intensity of HMCP upon addition of various metals (10  $\mu\text{M}$ ) in MeOH/H<sub>2</sub>O (9:1, v/v) (HEPES Buffer, pH =7.2) (red bars) and Al<sup>3+</sup> (20  $\mu\text{M}$ ) in presence of other metal ions (Green bars).

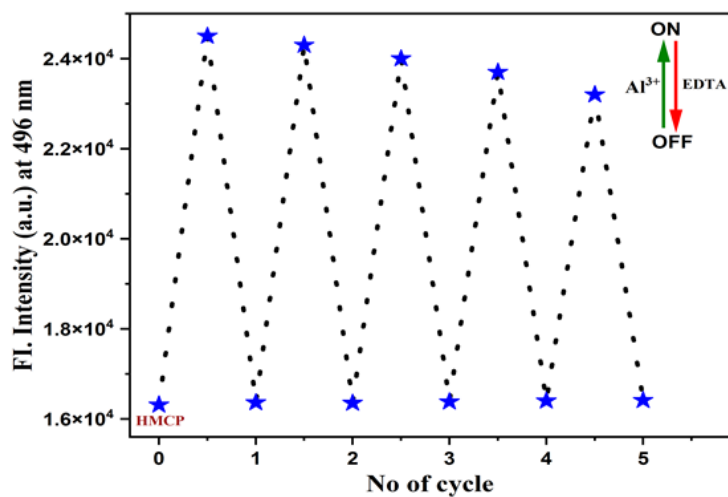

**Figure S17:** Fluorescence ‘OFF-ON-OFF’ repetitive cycle upon each sequential addition of Al<sup>3+</sup> and EDTA ion for HMCP at 496 nm ( $\lambda_{\text{ex}} = 351$  nm) in MeOH/H<sub>2</sub>O (9:1, v/v) (HEPES Buffer, pH =7.2) solution

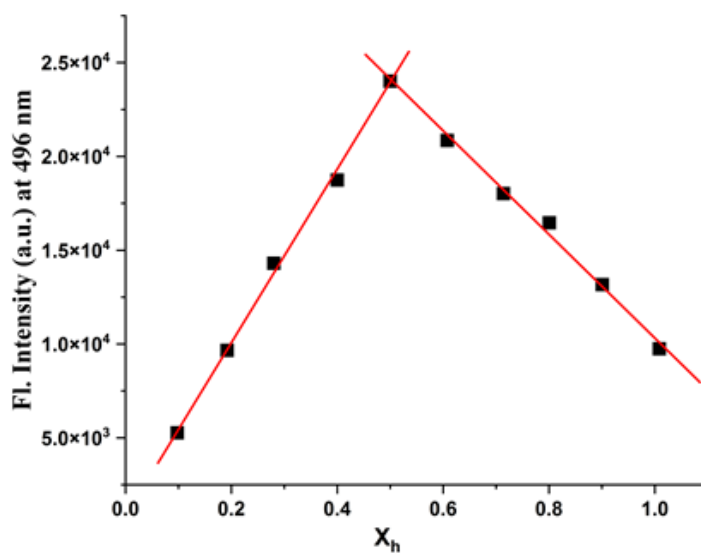

**Figure S18:** Job's plot of HMCP for Al<sup>3+</sup>

**Table S2:** Comparison of emission intensity enhancement of HMCP and its analogues upon addition of ct-DNA

| Compound | Emission intensity enhanced by Al <sup>3+</sup> | Emission intensity enhanced by DNA |
|----------|-------------------------------------------------|------------------------------------|
| HMCP     | ~ 14 fold                                       | ~ 8 fold                           |
| MCMP     | ~ 12 fold                                       | ~ 4.5 fold                         |
| MCMB     | ~ 9 fold                                        | ~ 1.6 fold                         |

**Table S3:** Recovery experiment for various natural water samples using the proposed methods

| Source                                  | Water samples studied | Amount of standard Al <sup>3+</sup> spiked (μmol) | Total Al <sup>3+</sup> found (μmol) <sup>b</sup> | Recovery (%) |
|-----------------------------------------|-----------------------|---------------------------------------------------|--------------------------------------------------|--------------|
| Tap water (Department of Chemistry)     | Tap water 1           | 5                                                 | 4.94 ± 0.04                                      | 98.8         |
|                                         | Tap water 2           | 10                                                | 9.95 ± 0.06                                      | 99.5         |
|                                         | Tap water 3           | 15                                                | 15.03 ± 0.35                                     | 100.2        |
| Lake water (Jadavpur University campus) | Lake water 1          | 5                                                 | 4.9 ± 0.07                                       | 98.6         |
|                                         | Lake water 2          | 10                                                | 9.65 ± 0.05                                      | 96.5         |
|                                         | Lake water 3          | 15                                                | 14.97 ± 0.06                                     | 99.8         |

<sup>b</sup>Relative standard deviations were calculated based on three times of measurement.

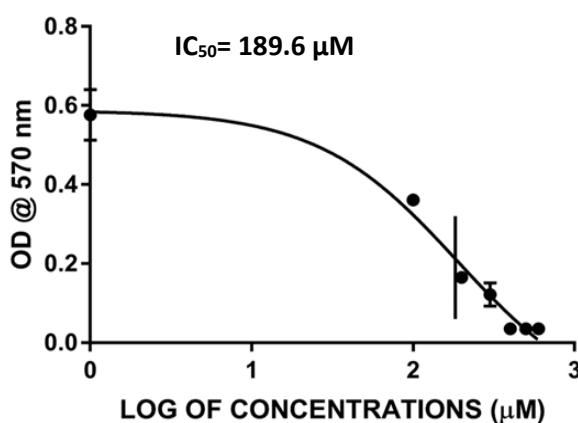

**Figure S19:** IC<sub>50</sub> dose of the probe (HMCP) in human breast cancer cells

### Determination of fluorescence Quantum Yields ( $\Phi$ ) of HMCP and its complex with $Al^{3+}$

The luminescence quantum yield was determined using coumarin-153 as reference dye. The compounds and the reference dye were excited at the similar wavelength and the emission spectra were then studied. The area of the emission spectrum was integrated and the quantum yield is determined according to the following equation:

$$\phi_S/\phi_R = [A_S / A_R] \times [(Abs)_R / (Abs)_S] \times [n_S^2/n_R^2]$$

Here,  $\phi_S$  and  $\phi_R$  are the luminescence quantum yields of the sample and reference dye, respectively.  $A_S$  and  $A_R$  are the area under the emission spectra of the sample and the reference respectively,  $(Abs)_S$  and  $(Abs)_R$  are the respective optical densities of the sample and the reference solution at the wavelength of excitation, and  $n_S$  and  $n_R$  stand for the values of refractive index for the respective solvent used for the sample and reference.

The quantum yields of HMCP and HMCP- $Al^{3+}$  are determined using the above mentioned equation and the values are found to be 0.03 and 0.21 respectively. Radiative rate constant  $K_r$  and total non radiative rate constant  $K_{nr}$  have been calculated using the equation  $\tau^{-1} = K_r + K_{nr}$  and  $K_r = \phi_f / \tau$  (Table. S4).

**Table S4:** Determination of Fluorescence life-time data, quantum yield, radiative and non-radiative rate constants

| Compd.                           | Quantum yield( $\phi$ ) | $\tau$ (ns) | $K_r(10^8 \times S^{-1})$ | $K_{nr}(10^8 \times S^{-1})$ |
|----------------------------------|-------------------------|-------------|---------------------------|------------------------------|
| <b>HMCP</b>                      | 0.03                    | 1.12        | 0.2678                    | 8.66                         |
| <b>HMCP-<math>Al^{3+}</math></b> | 0.21                    | 4.24        | 0.4952                    | 1.8632                       |

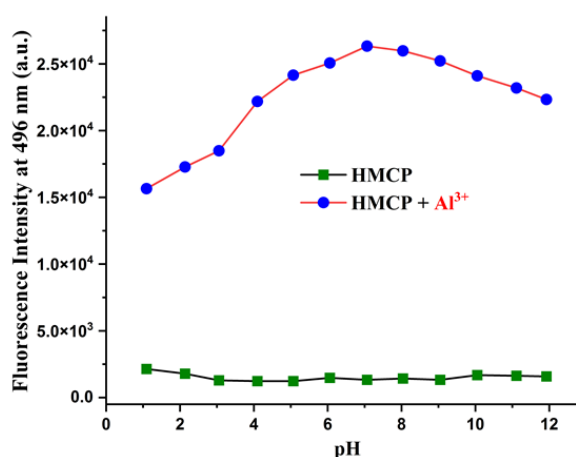

**Figure S20:** pH study of HMCP for  $Al^{3+}$

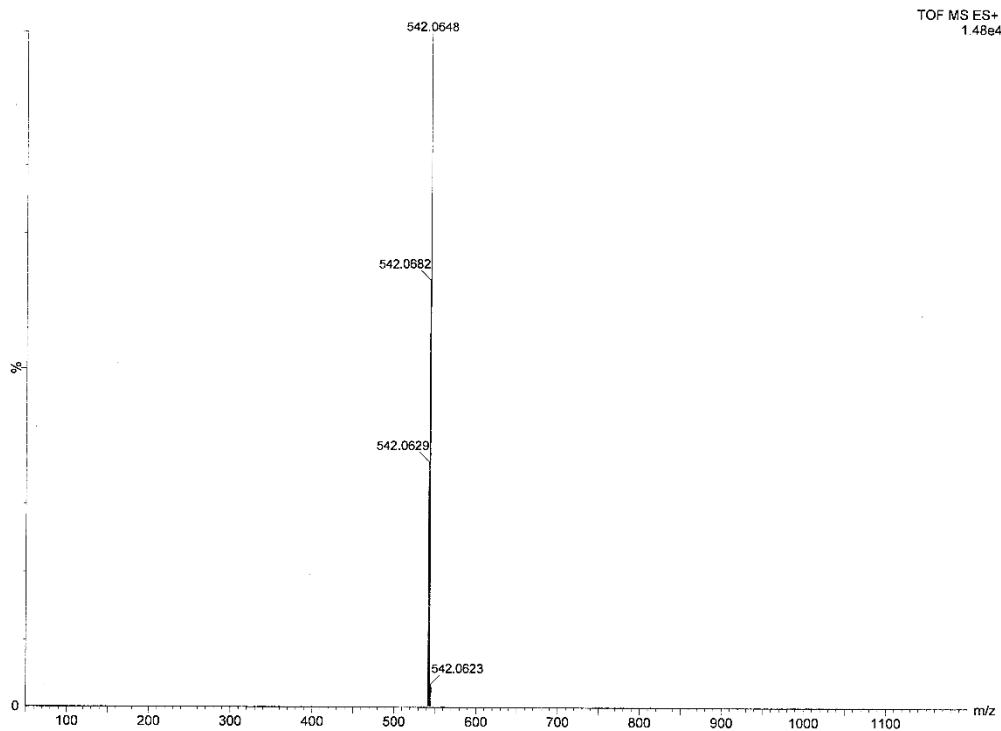

**Figure S21:** HRMS of HMCP-Al<sup>3+</sup> complex

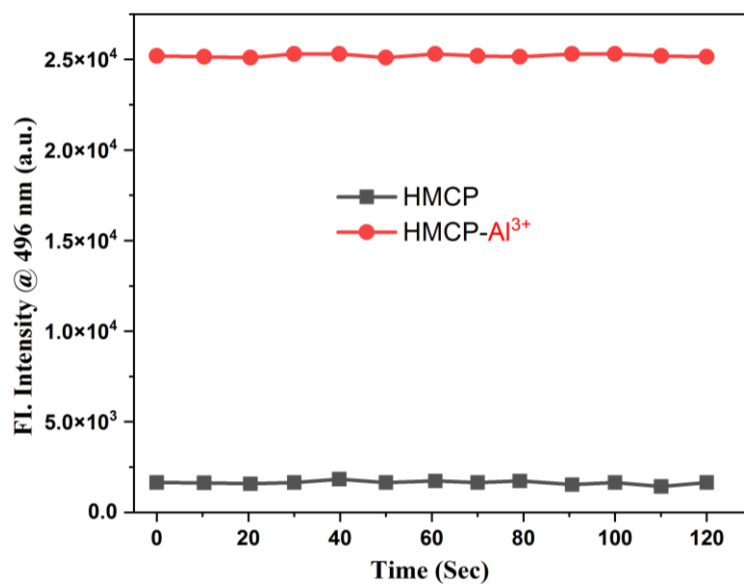

**Fig. S22:** Photosensitivity study of HMCP and its complex

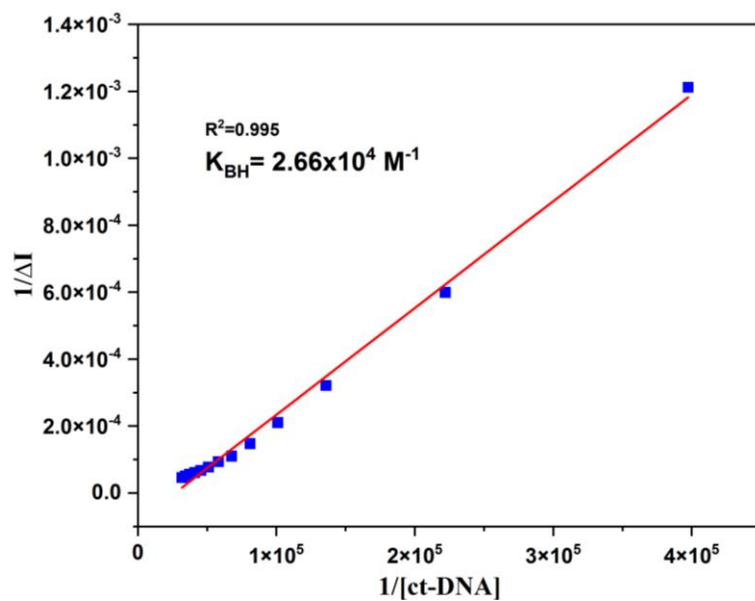

**Fig. S23:** Determination of binding constant of HMCP at 476 nm depending on ct-DNA concentration using Benesi-Hildebrand equation

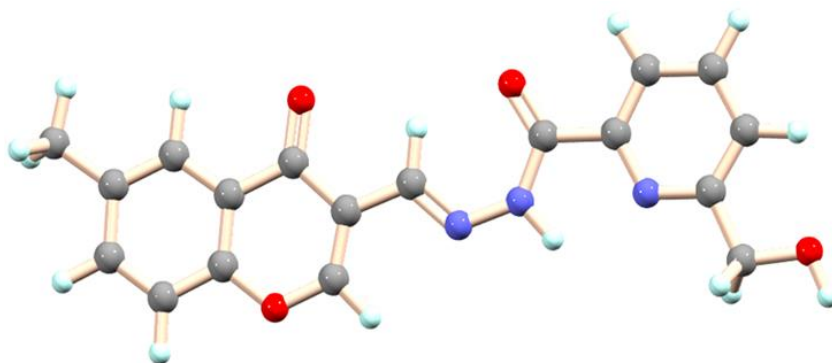

**Figure S24:** Optimized structure of HMCP calculated by DFT/B3LYP/6-31+G(d) method

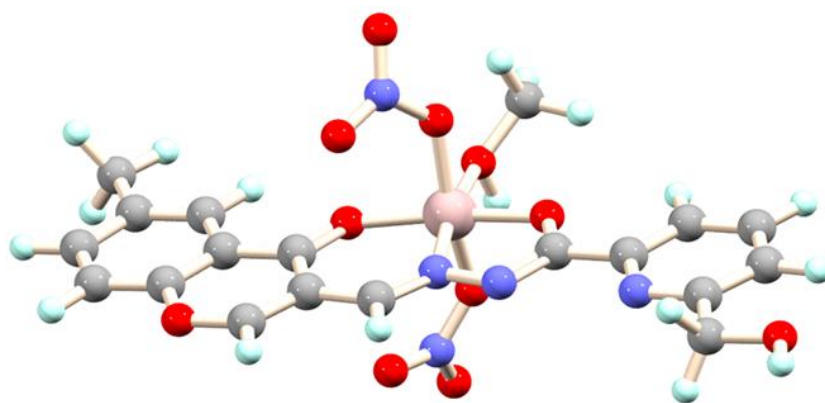

**Figure S25.** Optimized structure of HMCP-Al<sup>3+</sup> complex calculated by DFT/B3LYP/6-31+G(d) method

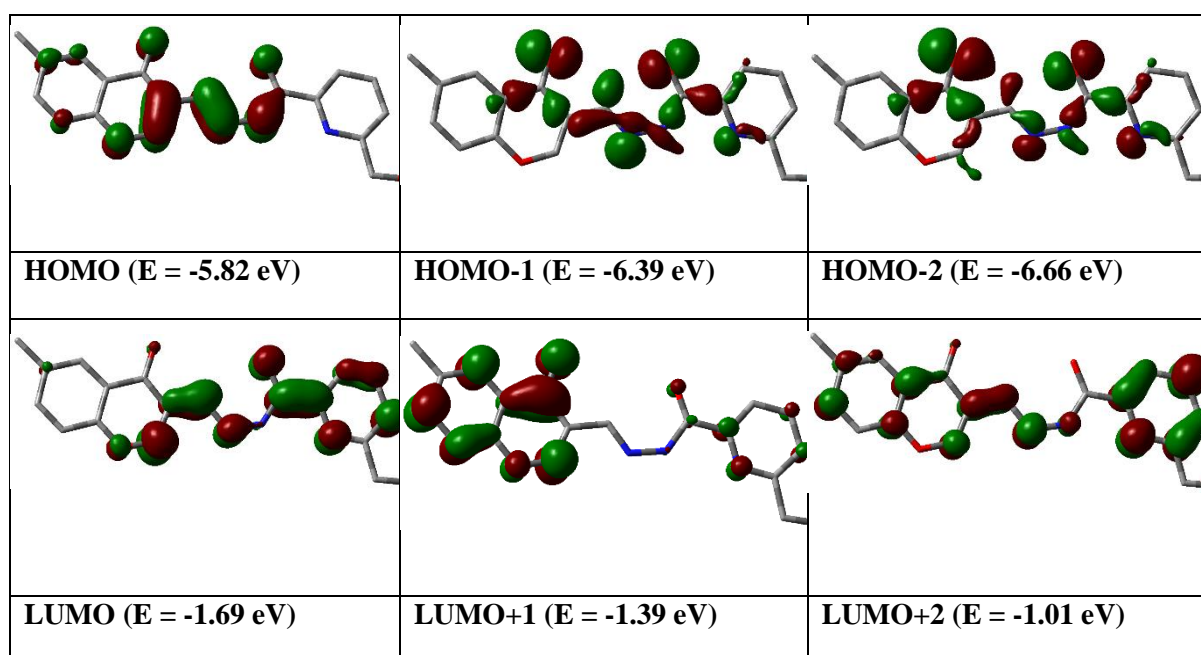

**Figure S26.** Contour plots of some selected molecular orbitals of HMCP



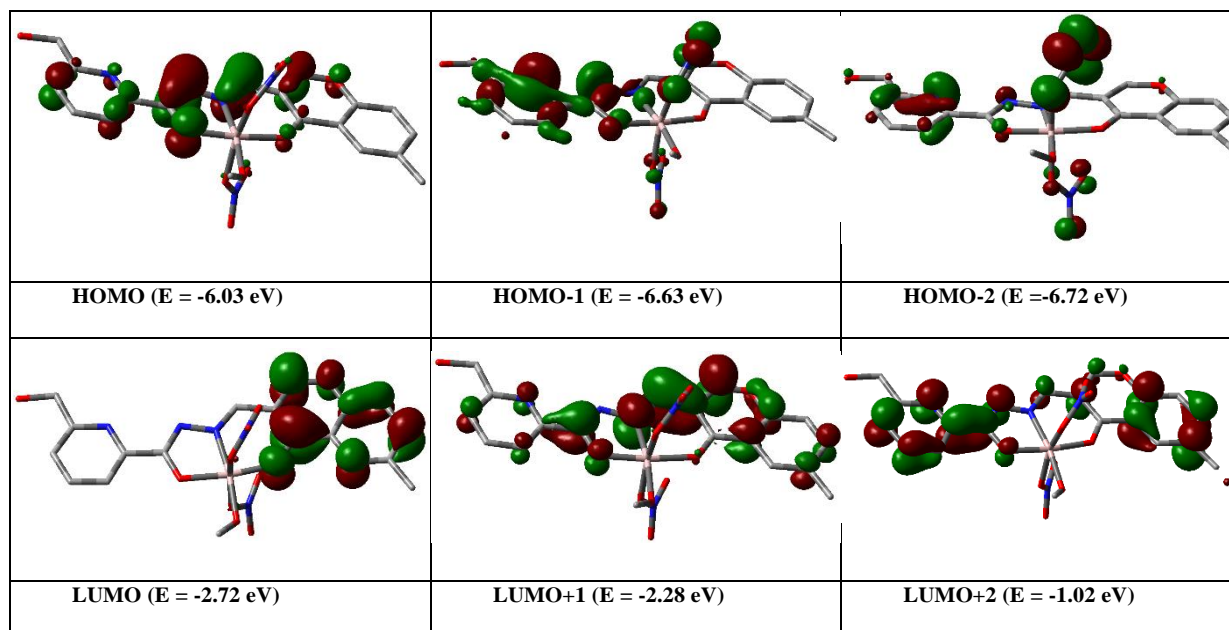

**Figure S27.** Contour plots of some selected molecular orbitals of HMCP-Al<sup>3+</sup> complex

**Table S5.** Energy and compositions of some selected molecular orbitals of HMCP and HMCP-Al<sup>3+</sup>

| MO     | Energy (eV) |                       |
|--------|-------------|-----------------------|
|        | HMCP        | HMCP-Al <sup>3+</sup> |
| LUMO+5 | 0.74        | -0.45                 |
| LUMO+4 | 0.02        | -0.59                 |
| LUMO+3 | -0.63       | -0.73                 |
| LUMO+2 | -1.01       | -1.02                 |
| LUMO+1 | -1.39       | -2.28                 |
| LUMO   | -1.69       | -2.72                 |

|        |       |       |
|--------|-------|-------|
| HOMO   | -5.82 | -6.03 |
| HOMO-1 | -6.39 | -6.63 |
| HOMO-2 | -6.66 | -6.72 |
| HOMO-3 | -6.69 | -6.80 |
| HOMO-4 | -7.09 | -6.85 |
| HOMO-5 | -7.13 | -7.33 |

**Table S6.** Vertical electronic transitions calculated by TDDFT/B3LYP/CPCM method for HMCP and HMCP-Al<sup>3+</sup> in methanol

| Compounds                   | $\lambda$ (nm) | E (eV) | Osc. Strength (f) | Key excitations      | Character               | $\lambda_{\text{expt.}}$ (nm) ( $\epsilon$ , M <sup>-1</sup> cm <sup>-1</sup> ) |
|-----------------------------|----------------|--------|-------------------|----------------------|-------------------------|---------------------------------------------------------------------------------|
| <b>HMCP</b>                 | 335.44         | 3.6962 | 0.7610            | (96%)<br>HOMO→LUMO   | $\pi \rightarrow \pi^*$ | 314<br>(60408)                                                                  |
|                             | 309.01         | 4.0124 | 0.0650            | (91%)<br>HOMO→LUMO+1 | $\pi \rightarrow \pi^*$ | 283<br>(47192)                                                                  |
|                             | 277.95         | 4.4607 | 0.0637            | (86%)<br>HOMO→LUMO+2 | $\pi \rightarrow \pi^*$ |                                                                                 |
| <b>HMCP-Al<sup>3+</sup></b> | 380.93         | 3.2547 | 0.0868            | (97%)<br>HOMO→LUMO   | $\pi \rightarrow \pi^*$ | 424<br>(61475)                                                                  |
|                             | 352.17         | 3.5206 | 0.8959            | (96%)<br>HOMO→LUMO+1 | $\pi \rightarrow \pi^*$ | 407<br>(58289)                                                                  |
|                             | 310.88         | 3.9881 | 0.1218            | (66%) HOMO-3→LUMO    | $\pi \rightarrow \pi^*$ |                                                                                 |

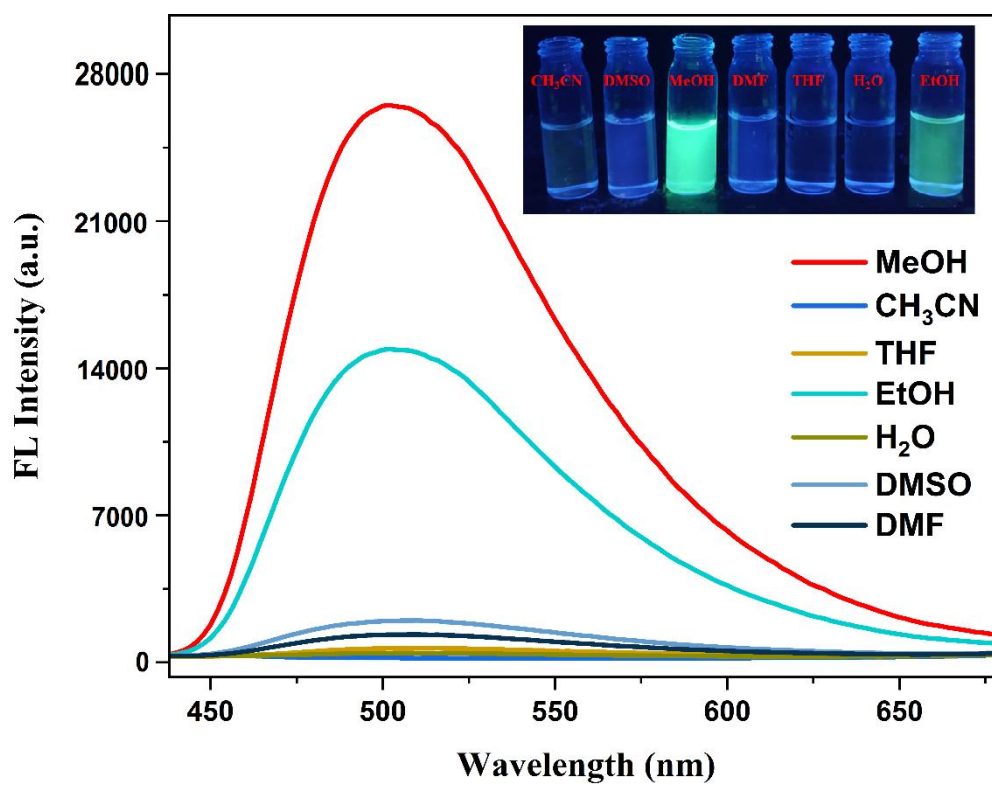

**Figure S28:** Solvent optimization: Emission intensity change and fluorescence image of HMCP (10  $\mu$ M) in different solvents in presence of Al<sup>3+</sup> (20  $\mu$ M).

**Table S7:** Comparison of sensor HMCP with other previously reported probes with respect to testing condition LOD value and test strips experiment

| Chemoreceptors                                                                      | Testing Condition                                     | Detection limit         | Test Strips | References |
|-------------------------------------------------------------------------------------|-------------------------------------------------------|-------------------------|-------------|------------|
| 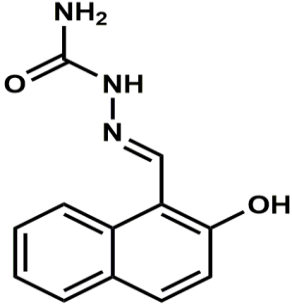   | EtOH/H <sub>2</sub> O, (1/9, v/v, pH=5.3, 25°C)       | 6.75x10 <sup>-8</sup> M | No          | [1]        |
|   | ACN:H <sub>2</sub> O (2:1, v/v, pH=7.2), HEPES Buffer | 0.62 μM                 | No          | [2]        |
|  | Acetonitrile-Water(4:1, v/v, pH=7.2)                  | 0.5x10 <sup>-9</sup> M  | Yes         | [3]        |
|  | CH <sub>3</sub> OH-H <sub>2</sub> O (9:1, v/v)        | 4.78 μM                 | Yes         | [4]        |
|  | H <sub>2</sub> O                                      | 0.397 μM                | No          | [5]        |

|                                                                                                 |                                                                  |                                |            |                            |
|-------------------------------------------------------------------------------------------------|------------------------------------------------------------------|--------------------------------|------------|----------------------------|
| 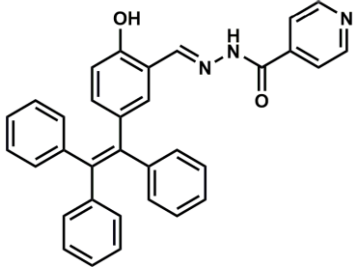               | <p>MeOH-H<sub>2</sub>O (9:1, v/v),<br/>Tris Buffer, pH=7.4</p>   | <p>1.587x10<sup>-7</sup> M</p> | <p>No</p>  | <p>[6]</p>                 |
|                | <p>MeCN-DMF (1:3, v/v)</p>                                       | <p>1.4 μM</p>                  | <p>Yes</p> | <p>[7]</p>                 |
|                | <p>H<sub>2</sub>O-MeOH (1:1, v/v, pH=6.0)</p>                    | <p>31.2 nM</p>                 | <p>No</p>  | <p>[8]</p>                 |
|              | <p>DMF</p>                                                       | <p>5.0X10<sup>-6</sup> M</p>   | <p>No</p>  | <p>[9]</p>                 |
|              | <p>DMSO-H<sub>2</sub>O (99:1, v/v, pH=7-8)</p>                   | <p>0.04 μM</p>                 | <p>No</p>  | <p>[10]</p>                |
|  <p>HMCP</p> | <p>MeOH/H<sub>2</sub>O (9:1, v/v)<br/>(HEPES Buffer, pH=7.2)</p> | <p>3.12x10<sup>-7</sup> M</p>  | <p>Yes</p> | <p><b>Present Work</b></p> |

## References:

- 1 L. Hou, W. Liang, C. Deng, C. Zhang, B. Liu, S. Shuang and Y. Wang, *RSC Adv.*, 2020, **10**, 21629-21635
- 2 M. B. Maity, B. Dutta, A. Rahaman, N. Sahu, D. P. Mandal, S. Bhattacharjee and C. Sinha, *J. Mol. Struct.* 2022, **1250**, 131870
- 3 A. Biswas, R. Naskar, D. Mitra, A. Das, S. Gharami, N. Murmu and T. K. Mondal, *New J. Chem.*, 2022, **46**, 21968
- 4 B. Das, M. Dolai, A. Ghosh, A. Dhara, A. D. Mahapatra, D. Chattopadhyay, S. Mabhai, A. Jana, S. Dey and A. Misra, *Anal. Methods.*, 2021, **13**, 4266-4279
- 5 N. Mudi, M. Shyamal, P. K. Giri, S. S. Samanta and R. Ramirtz-Tagle and A. Misra, *J. Photochem. Photobiol.*, 2023, **22**, 1491-1503
- 6 M. Wang, L. Lu, W. Song, X. Wang, T. Sun, J. Zhu and J. Wang, *J. Lumin.*, 2021, **233**, 117911
- 7 J. S. Heo, D. Gil and C. Kim, *J. Fluoresc.*, 2022, **32**, 825-833
- 8 J. Wang, L. Feng, J. Chao, Y. Wang, S. Shuang, *Anal. Methods*, 2019, **11**, 5598
- 9 N. Ahfad, G. Mohammadnezhad, S. Meghdabi and H. Farrokhpour, *Spectrochim. Acta A Mol.*, 2020, **228**, 117753
- 10 J. A. Anshori, D. Ismalah, A. F. Abror, A. Zainuddin, I. W. Hidayat, M. Yusuf, R. Maharani, A. T. Hidayat, *RSC Adv.*, 2022, **12**, 2972
